1 **Effects of forest management on the phenology of early-flowering understory herbs**

2

3 **Running Title: Forest management affects plant phenology**

4

5 Franziska M. Willems<sup>1</sup>, J.F. Scheepens<sup>1</sup>, Christian Ammer<sup>3</sup>, Svenja Block<sup>1</sup>, Anna

6 Bucharova<sup>1,2</sup>, Peter Schall<sup>3</sup>, Melissa Seht<sup>1</sup> and Oliver Bossdorf<sup>1</sup>

7

8 <sup>1</sup> Plant Evolutionary Ecology, Institute of Evolution and Ecology, University of Tübingen,  
9 Germany

10 <sup>2</sup> Biodiversity and Ecosystem Research Group, Institute of Landscape Ecology, University of  
11 Münster, Germany

12 <sup>3</sup> Silviculture and Forest Ecology of the Temperate Zones, University of Göttingen,  
13 Göttingen, Germany

14

15 **Correspondence:** Franziska Merle Willems, [franziska.willems@uni-tuebingen.de](mailto:franziska.willems@uni-tuebingen.de), tel: +49

16 15787855515

17

18 **Orcid IDs**

19 Franziska M. Willems: <https://orcid.org/0000-0002-5481-3686>

20 J.F. Scheepens: <https://orcid.org/0000-0003-1650-2008>

21 Christian Ammer: <https://orcid.org/0000-0002-4235-0135>

22 Svenja Block: <https://orcid.org/0000-0002-8215-3849>

23 Anna Bucharova: <https://orcid.org/0000-0002-5468-5426>

24 Peter Schall: <https://orcid.org/0000-0003-4808-818X>

25 Oliver Bossdorf: <https://orcid.org/0000-0001-7504-6511>

26 **Abstract**

27 Many organisms respond to anthropogenic environmental change through shifts in their  
28 phenology. In plants, flowering is largely driven by temperature, and therefore affected by  
29 climate change. However, on smaller scales climatic conditions are also influenced by other  
30 factors, including habitat structure. A group of plants with a particularly distinct phenology  
31 are the understorey herbs in temperate forests. In these forests, management alters tree species  
32 composition and stand structure and, as a consequence, light conditions and microclimate.  
33 Forest management should thus also affect the phenology of understorey herbs. To test this,  
34 we recorded the flowering phenology of 20 early-flowering herbs on 100 forest plots varying  
35 in management intensity, from near-natural to intensely managed forests, in Central and  
36 Southern Germany. We found that in forest stands with a high management intensity the  
37 plants flowered on average about two weeks later than in unmanaged forests. This was largely  
38 because management also affected microclimate (e.g. spring temperatures of 5.9 °C in  
39 managed coniferous, 6.7 in managed deciduous and 7.0 °C in unmanaged deciduous plots),  
40 which in turn affected phenology, with plants flowering later on colder and moister forest  
41 stands (+4.5 days per -1°C and 2.7 days per 10 % humidity increase). Among forest  
42 characteristics, the main tree species as well as the age, overall crown projection area,  
43 structural complexity and spatial distribution of trees had the greatest influence on  
44 microclimate. Our study demonstrates that forest management alters plant phenology, with  
45 potential far-reaching consequences for the ecology and evolution of understorey  
46 communities. More generally, our study suggests that besides climate change other drivers of  
47 environmental change, too, can influence the phenology of organisms.

48

49 **Keywords:** Global change, forest structure, land-use change, phenological shifts, structural  
50 equation modelling, microclimate, temperature, climate change

## 51 **Introduction**

52 Phenology is the study of the timing of recurrent biological events, the biotic and abiotic  
53 drivers of this timing, and its variation within and among species (Lieth, 1974). It includes the  
54 seasonal timing of key life events, such as animal migration or reproduction, or the leaf-out,  
55 flowering and fruiting of plants, which are important for individual fitness. In plants, many  
56 phenological events are triggered by biotic and abiotic environmental factors, especially  
57 temperature, and are therefore sensitive to climate change (Schwartz, Ahas, & Aasa, 2006;  
58 Tang et al., 2016). Long-term observational studies have found earlier leaf-out and changes in  
59 the start of flowering associated with climate change across the world (Fitter and Fitter, 2002;  
60 Schwartz et al., 2006). Spring-flowering plants seem to be particularly responsive to climate  
61 change and often show the largest phenological shifts (Chmielewski, Müller, & Bruns, 2004;  
62 Fitter and Fitter, 2002; Renner & Zohner, 2018).

63       Plants play a key role in many ecosystems, and they interact with many other species.  
64 Therefore shifts in plant phenology can have significant consequences for pollinators, food  
65 webs, agricultural yields, as well as many ecosystem functions and services such as  
66 productivity and carbon cycling (Chmielewski et al., 2004; Cleland et al., 2007; Reilly et al.,  
67 1996; Tang et al., 2016;). Understanding the drivers of phenology variation is thus important  
68 to predict future states of species abundance and distribution, biogeochemistry and ecosystem  
69 productivity, as well as ecosystem services such as pollination (Chuine, 2010; Durant et al.,  
70 2005; Høye, Post, Eric, Schmidt, Trøjelsgaard, & Forchhammer, 2013; Kharouba et al., 2018;  
71 McKinney et al., 2012; Memmott, Craze, Waser, & Price, 2007; Richardson et al., 2010), and  
72 it should also help to inform environmental conservation (Cerdeira Morellato et al., 2016) and  
73 to develop adaptive management strategies in a changing world (Bellard, Bertelsmeier,  
74 Leadley, Thuiller, & Courchamp, 2012; Enquist, Kellermann, Gerst, & Miller-Rushing, 2014;  
75 Pacifici et al., 2015; Walther, 2010).

76           However, our mechanistic understanding of the impact of environmental change on  
77 plant phenology is still limited (Richardson et al., 2012). In particular, besides climate  
78 warming the influences of other global change drivers – such as land use change – on plant  
79 phenology have received little attention. On small scales, climatic conditions such as  
80 temperature and humidity are also influenced by a variety of habitat factors such as  
81 topography or forest cover (Geiger, Aron and Todhunter, 2003). As a consequence,  
82 microclimates can differ from regional climate patterns and affect the timing of phenological  
83 events on small spatial scales (Hwang et al., 2011; Ward, Schulze, and Roy, 2018). In forests,  
84 stand structure affects the microclimate and light availability (Baker et al., 2014; Chen et al.,  
85 1999) and is thus likely to impact flowering phenology of understory herbs. Forest stand  
86 structure can be defined as the distribution of trees in space and their variability in size,  
87 arrangement, consistency and time (Schall et al., 2018). Stand structure can, for example, be  
88 characterized by the main tree species, the ages of trees, their mean diameters at breast height,  
89 the basal area covered, or their crown projection area (Schall et al., 2018). Furthermore, stand  
90 structural complexity indices (SCI, see for example Zenner and Hibbs (2000)) can combine  
91 several structural attributes (Gossner et al., 2014; del Río et al., 2016) or take the spatial  
92 distribution of trees into account (Ehbrecht, Schall, Ammer and Seidel 2017; Penttinen,  
93 Stoyan, and Henttonen, 1992).

94           Changes in forest management alter stand structure in temperate forests and, as a  
95 consequence, microclimate conditions. While thinnings and selection cuttings lead to only  
96 small increases of radiation at the forest floor (Aussenac 2000; Hale, 2003), clear-cuttings  
97 result in drastic and long-persisting changes of the microclimate. In deciduous forests, there is  
98 a time window during spring when the leaf-out of trees is not yet completed that allows early  
99 spring-flowering species to take full advantage of the available sunlight, moisture and  
100 nutrients of the forest floor (Lapointe, 2001). Planting of evergreen coniferous trees – such as

101 Norway spruce (*Picea abies* (L.) H. Karst), one of the most economically important tree  
102 species in Europe (Spiecker, 2003) – reduces the light availability during early spring and  
103 changes microclimatic conditions. More generally, all management changes that alter tree  
104 species composition and stand structure are likely to also affect the phenology of forest  
105 understory herbs, through changes in radiation, microclimate, or other factors. Because of  
106 their narrow and distinct flowering period, spring-flowering forest herbs should thus be  
107 particularly susceptible to management changes, and therefore they are a particularly relevant  
108 study system for exploring forest management effects on plant phenology.

109       Here, we studied the phenology of 20 early-flowering forest herbs on 100 forest plots of  
110 different management type and intensity. We hypothesized that forest management would  
111 change forest structure and, as a consequence, microclimatic conditions that impact flowering  
112 phenology. We obtained detailed phenology, forest structure and microclimate data for each  
113 of the studied plots, and we used structural equation modelling to understand the underlying  
114 causal relations, and to disentangle the direct and indirect effects that different forest  
115 characteristics and microclimatic variables have on plant phenology. Specifically, we asked  
116 the following questions: (i) Does forest management intensity affect plant phenology? (ii)  
117 Which forest characteristics are the strongest drivers of phenological variation? And (iii) to  
118 what extent do forest characteristics affect phenology directly versus indirectly through  
119 changing microclimatic conditions?

120

## 121 **Methods**

### 122 *Study system*

123 Most forests in Central Europe have a rather low tree diversity and are dominated by only few  
124 deciduous tree species (Schulze et al., 2016). Therefore, variation in stand structures is to a  
125 substantial degree related to the effects of forest management (Schall et al., 2018). Here we

126 studied the forest plots of the Biodiversity Exploratories project ([www.biodiversity-](http://www.biodiversity-exploratories.de)  
127 [exploratories.de](http://www.biodiversity-exploratories.de)) in Germany, a large-scale platform for ecological research that includes a  
128 broad range of forests plots of different management types and intensities (Fischer et al.  
129 2010). We focused on 100 forest plots (100 × 100 m) located in equal parts in two of the three  
130 regions of the Biodiversity Exploratories, the Schwäbische Alb in Southwest Germany (long:  
131 9.39°, lat: 48.44°) and the Hainich-Dün in Central Germany (long: 10.47°, lat: 51.16°). The  
132 elevation a.s.l. range from 285–550 m in the Hainich-Dün area to 460–860 m on the  
133 Schwäbische Alb. Further details on the characteristics of the regions are provided in Fischer  
134 et al. (2010). The forests in the study areas are dominated by native deciduous trees, mainly  
135 European beech (*Fagus sylvatica* L.). However, some forests were converted to plantations of  
136 Norway spruce (*Picea abies*), a coniferous species originally restricted to montane regions,  
137 but cultivated for timber in the lowlands since 250 years (see Figure 1 & Schall et al., 2018).  
138 The studied plots included (more intensively managed) even-aged deciduous forests at a range  
139 of developmental stages, but also uneven-aged and unmanaged deciduous plots, as well as  
140 managed even-aged stands of coniferous spruce forests of different age-classes (see Table S6  
141 & Schall et al., 2018). On all but three plots the main tree species was either beech or spruce,  
142 and we therefore grouped all beech plots together with the three other hardwood-dominated  
143 plots as deciduous forest plots ( $N = 83$  plots) for the subsequent analyses, whereas plots  
144 dominated by Norway spruce were labelled as coniferous forest plots ( $N = 17$  plots).

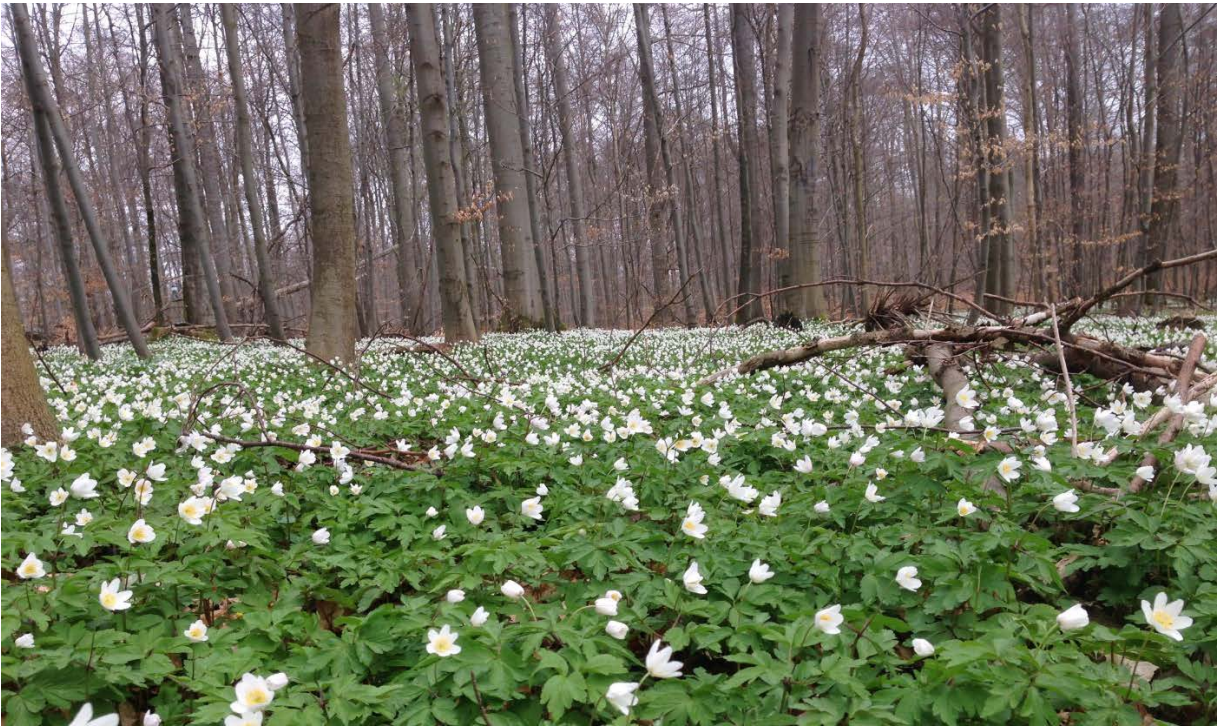

145

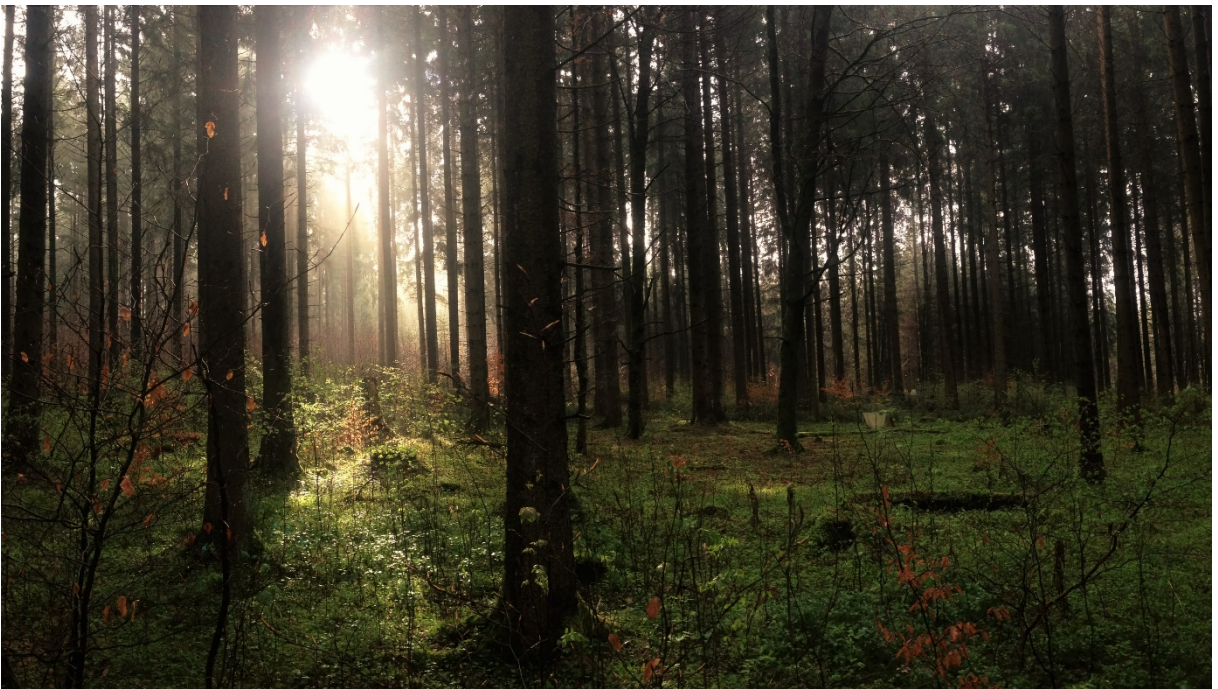

146

147 **Figure 1:** Impressions from the study plots. Top: beech plot at the Hainich-Dün. Bottom:

148 spruce plot at the Schwäbische Alb. Both photos were made in April 2017.

149

150 *Phenological monitoring*

151 From March to June 2017, we monitored the phenology of 20 early-flowering herbs in the  
152 understories of our study plots (see Figure 2 and Table S1). The monitored species included  
153 all common spring-flowering herbs in the plots. We visited all 100 forest plots once per week  
154 and monitored the phenology of all plants within a 3 m wide strip outside the 20 × 20 m core  
155 area of each plot, corresponding to an area of 224 m<sup>2</sup> within each 1 ha plot. For each species  
156 in each plot, we recorded flowering start as the day of the year with the first fully open flower,  
157 and flowering end as the time when no fully open flowers could be found anymore. To be able  
158 to determine flowering peaks, we counted the number of open inflorescences or, if plants were  
159 abundant on a plot, we estimated the percentages of flowering individuals. We then defined  
160 the day of the year with the highest number or percentage of open inflorescences as the day of  
161 flowering peak. If there were two days with equal maximum flowering, we used their median  
162 as the time of peak flowering. If we visited a plot, and it was apparent that a start, peak or end  
163 of flowering had been between the present and past visit, we dated this record back to the  
164 previous Monday or Thursday, resulting in an effective half-weekly resolution of our data.



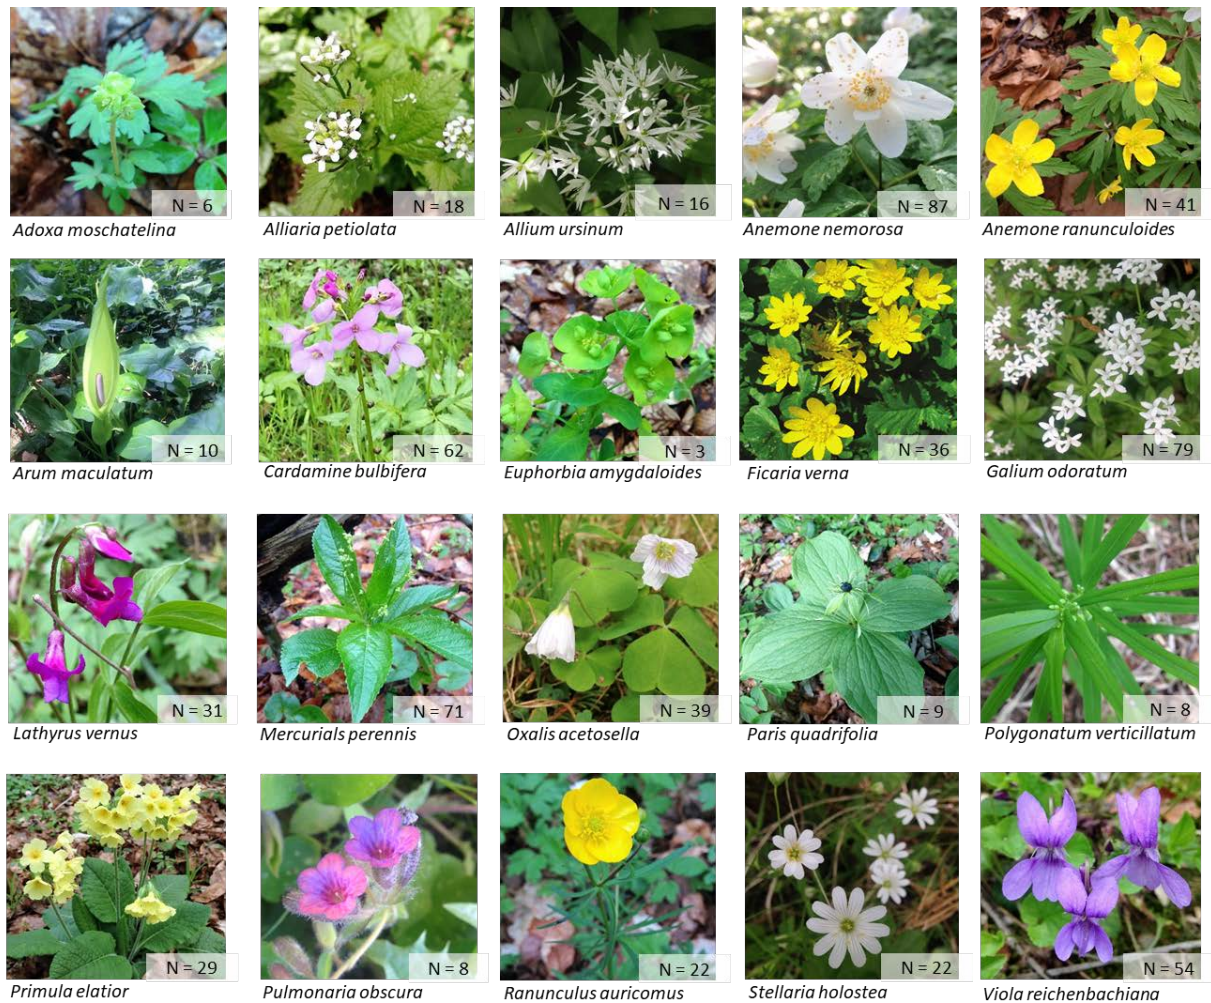

165

166 **Figure 2:** The 20 early-flowering forest understory species included in our phenology  
167 monitoring. For each species, the number of plots with flowering individuals is indicated in  
168 the bottom right corner.

169

### 170 *Forest characteristics*

171 The structure of the studied forests is strongly influenced by management, and it can be  
172 characterized by differing forest attributes. The required data have been collected in two forest  
173 inventories that were conducted on the forest plots of the Biodiversity Exploratories at single-  
174 tree level for all living trees with a diameter at breast height  $\geq 7$  cm. We generally used the  
175 data from the most recent inventory (2014-2016) except for 12 plots where these data were  
176 incomplete and we therefore used information from the previous inventory in 2008-2011.

177 Specifically, we used the following variables: main tree species (deciduous vs. coniferous),  
178 the mean age of the main tree species, the richness and diversity (inverse Simpson's index) of  
179 tree species, crown projection area, the share of conifers based on crown projection, stand  
180 density, the mean diameter at breast height and its standard deviation, and the basal area  
181 covered with trees. Furthermore, we used Morisita's index of dispersion as well as Clapham's  
182 variance mean ratio as measures of horizontal heterogeneity (for both <1: regular, >1:  
183 clumping, 1: random; 20 m × 20 m raster cells), and Zenner's Structural Complexity Index  
184 based on tree height as a proxy for vertical structural complexity (Zenner, 1998). We selected  
185 these variables because they characterize stand structure, and we expected them to have an  
186 influence on microclimatic conditions as well as on light availability and other abiotic and  
187 biotic factors. In addition to these individual forest variables, we also tested an index for  
188 silvicultural management intensity developed by Schall and Ammer (2013) which combines  
189 tree species, stand age and aboveground living and dead wood biomass as three main  
190 characteristics of a forest stand into an overall measure of forest management intensity. For an  
191 overview of all explanatory variables, see Figure S8.

192

### 193 *Microclimate and other environmental data*

194 Besides the data on forest structure, there is detailed information on local microclimate  
195 available for all plots in the Biodiversity Exploratories (Fischer et al., 2010). To be able to test  
196 for relationships between microclimate, forest management and phenology, we compiled data  
197 for two different potentially relevant time periods, the spring months during which our  
198 phenology monitoring took place, and the preceding winter months. For the spring months  
199 (February–May 2017), we calculated the average mean air temperature (measured at 10 cm  
200 and 2 m height), the growing days (=days with mean temperatures between 10°C to 30°C), the  
201 growth sum (= sum of mean day temperatures > 5°C (minus 5)), the warm sum (= sum of

202 mean day temperatures with  $> 10\text{ }^{\circ}\text{C}$  (minus 10)), mean relative air humidity (measured at 2  
203 m), as well as mean soil moisture and soil temperature (both measured at 10 cm depth). For  
204 the winter months (October 2016 - January 2017), we also calculated the mean air temperature  
205 (measured at 2 m height and 10 cm height), the number of cold days (= days with a  
206 temperature minimum  $< 0^{\circ}\text{C}$ ), the cold sum (= sum of mean day temperatures  $< 0\text{ }^{\circ}\text{C}$ ), the  
207 number of cool days (= days with a temperature maximum  $< 10^{\circ}\text{C}$ ), the number of ice days  
208 (= days with a temperature maximum  $< 0^{\circ}\text{C}$ ), mean relative air humidity (measured at 2 m),  
209 as well as mean soil moisture and soil temperature (both measured at 10 cm depth).

210 In addition to the microclimate data, we also included several geographical variables  
211 that we expected to influence abiotic conditions at the stand level, such as exploratory  
212 (region), slope (in degrees; average over the plot area) and aspect (= circular average over the  
213 plot area,  $360^{\circ} = 0^{\circ}$  denote a north facing orientation,  $180^{\circ}$  indicates a south facing orientation  
214 etc.). We combined the data on aspect and slope combined into an aspect $\times$ slope variable by  
215 multiplying inclination by 1 for south-, -1 for north-, and 0.5 for east- and west-facing slopes,  
216 to be able to distinguish slopes in the four cardinal directions which are known to differ in  
217 their microclimatic conditions (Dahlgren, Zeipel, and Ehrlén, 2007). Elevation above sea level  
218 is confounded with region and therefore not included as an explanatory variable. For an  
219 overview of all explanatory variables, see Figure S8.

220

## 221 *Data analysis*

222 Our data analyses following a two-step logic. First, we used univariate linear regression to test  
223 the effects of forest management intensity, as well as individual forest characteristics and  
224 microclimatic variables on flowering time for all species separately. Second, we selected a  
225 subset of these variables for structural equation modelling, to understand the relationships  
226 between forest characteristics and microclimate, and disentangle direct and indirect effects on

227 plant phenology. Prior to the data analyses, we checked all variables for outliers, and if  
228 outliers clearly resulted from measurement errors, we removed them from our data set.  
229 Moreover, for the statistical analyses we excluded two species that were flowering on less  
230 than eight plots (Table S1), *Adoxa moschatellina* L. and *Euphorbia amygdaloides* L.

231 Using linear regression analyses, we calculated  $R^2$ -values, standardized regression  
232 coefficients and  $P$ -values (corrected for multiply testing using FDR) for each the relationships  
233 between each forest trait and microclimatic variable and the phenology of each studied  
234 species. We used these results to make an informed preselection of variables for the  
235 subsequent structural equation model (see next section), since especially the microclimatic  
236 variables included several temperature proxies with high levels of collinearity. All data  
237 analyses were conducted using R (R Core Team, 2018). Standardized regression coefficients  
238 were derived using the “QuantPsyc” package (Fletcher, 2012).

239 Next, we conducted confirmatory path analysis over all species based on piecewise  
240 fitting of component hierarchical linear mixed-effects models (Lefcheck, 2016; Shipley,  
241 2009). Path analysis or structural equation modelling is a powerful, multivariate technique  
242 used increasingly in ecology to evaluate complex multivariate causal relationships,  
243 particularly with observational data that often includes substantial collinearity. Structural  
244 equation models (SEMs) differ from many other modelling approaches as they test the direct  
245 and indirect effects in pre-assumed causal relationships (Fan et al. 2016). In our analysis we  
246 used the “piecewiseSEM” package (Lefcheck, 2016). In piecewise SEM, each set of  
247 relationships is estimated independently (or ‘locally’). For each response variable, the process  
248 decomposes the network into the corresponding simple or multiple linear regressions, which  
249 are evaluated separately, and then re-combined afterwards to draw conclusions about the full  
250 model (Lefcheck, 2016). The relationships between variables can then be visualized through

251 path diagrams where arrows denote which variables are influencing (and are influenced by)  
252 other variables.

253 Prior to our path analyses we checked for additivity and linearity of individual variables.  
254 We used correlation matrices (Figures S2) and variance inflation factors (with a cut-off value  
255 of 4) to check for collinearity among the explanatory variables, to avoid inclusion of highly  
256 correlated variables. We used simple regression plots to confirm linearity. Furthermore, to  
257 check the statistical assumptions of linear models – normality and homogeneity of residuals –  
258 we visually inspected histograms of the standardized residuals, Q-Q-Plots and residual scatter  
259 plots, as well as calculations of skewness and kurtosis. The skewness and kurtosis values were  
260 all within the guidelines set by Kline (2015) and also below the more conservative threshold  
261 set by Ryu (2011).

262 The subset of forest characteristics that we included in the SEM, after checking for  
263 collinearity, were: crown projection area, variance mean ratio, structural complexity index,  
264 diameter at breast height, its standard deviation, the percentage of coniferous trees. Diameter  
265 at breast height was selected as an explanatory variable over age and density because it was  
266 the best proxy for the developmental stage of a forest. After the exclusion of highly correlated  
267 variables and based on the simple linear regressions results (considering average  $r^2$ -values and  
268 standardized regression coefficients), mean spring air temperature and spring relative  
269 humidity were the only microclimatic variables we included in the SEM. Because other  
270 geographical or environmental factors might also influence plant phenology, we additionally  
271 included aspect×slope as well as exploratory (region) as explanatory variables in the SEM. In  
272 the sub-model with flowering peak as a response variable and forest characteristics and  
273 microclimatic variables as explanatory variables, we included species identity as a random  
274 variable. To test whether the forest characteristics influence the local microclimate, we set  
275 both spring air temperature and spring relative humidity also as response variables, while

276 using the forest characteristics as well as other geographical factors as explanatory variables.  
277 The complete dataset included 724 data points, but since 122 rows had missing values for at  
278 least one of the variables, we analysed the full SEM with 602 data points.

279 We evaluated the overall path model using Shipley's test of directed separation (Shipley  
280 2009), which yields a Fisher's C statistic comparable to a  $\chi^2$ . A  $P$ -value  $> 0.05$  indicates that a  
281 model can adequately reproduce the hypothesized causal network. Fisher's C is then used to  
282 calculate the Akaike Information Criterion (AIC), or a corrected AIC for small sample sizes  
283 (AICc), to compare model fits. We calculated both marginal and conditional  $R^2$ -values, where  
284 the former describes the proportion of variance explained by only fixed factors, whereas the  
285 latter describes the variance explained by fixed and random factors. Starting with a full model  
286 based on *a priori* knowledge of interactions that included all the above-mentioned variables,  
287 we used a backwards stepwise elimination process based on AICc to remove non-significant  
288 pathways. Additionally, we used d-separation tests to evaluate whether any non-hypothesized  
289 independent paths were significant, and whether the models could be improved by including  
290 any of the missing paths.

291

## 292 **Results**

293 The onset of flowering in our study species ranged from mid-March (*Mercurialis perennis* L.,  
294 *Primula elatior* (L.) Hill, *Anemone nemorosa* L.) to the beginning of May (*Galium odoratum*  
295 (L.) Scop.), *Arum maculatum* L., *Polygonatum verticillatum* (L.) All.). Similarly, the peak  
296 flowering time of the different species ranged from the end of March until the end of May.  
297 For some species, the flowering period ended already in mid-May while others continued to  
298 flower until mid-June. Besides these species differences in mean onset, peak and end of  
299 flowering, we also found large differences among species in their levels of among-plot  
300 variation (see Figure 4). Some species had very narrow ranges, e.g. the flowering peak of

301 *Galium odoratum* varied only by 10 days across the 79 studied plots, whereas for *Anemone*  
302 *nemorosa* ( $N = 87$ ) and *Mercurialis perennis* ( $N = 71$ ) the flowering peaks differed by up to  
303 42 and 46 days, respectively. For an overview of mean flowering start, peak and end, as well  
304 as the respective  $N$ , of all species see Supplement Table S1.

305

### 306 *Impact of forest management on phenology*

307 Across all studied species, forest understory herbs growing on plots with a high silvicultural  
308 management intensity had a significantly delayed start, peak and end of their flowering  
309 periods (Figure 3, Flowering start: correlation coefficient  $\beta = 12.11$ , adjusted  $R^2 = 0.01$ ,  $P$ -  
310 value = 0.013. Flowering peak: correlation coefficient  $\beta = 21.19$ , adjusted  $R^2 = 0.03$ ,  $P$ -value  
311  $< 0.001$ . Flowering end: correlation coefficient  $\beta = 22.43$ , adjusted  $R^2 = 0.06$ ,  $P$ -value  $<$   
312 0.001.) On plots with the highest forest management intensity, the average peak of flowering  
313 was over two week later than on plots with the lowest management intensity (day of the year  
314 127-129 in managed spruce forest and day of the year 118 in managed beech forests versus  
315 day of the year 113 in unmanaged beech forest). Generally, plants flowered later on plots  
316 dominated by coniferous trees than on deciduous forest plots (Figure 3 and 4). These general  
317 patterns were also reflected at the level of individual species: in all but one of the studied  
318 species, there was a positive (albeit not always significant) relationship between silvicultural  
319 management intensity and peak flowering (Table 1), with some of the strongest effects  
320 observed in *Primula elatior*, *Anemone nemorosa* and *Galium odoratum*, all of them  
321 emblematic spring flowers in temperate forests. For detailed regression results, see Table 1  
322 and Tables S5 and S6.

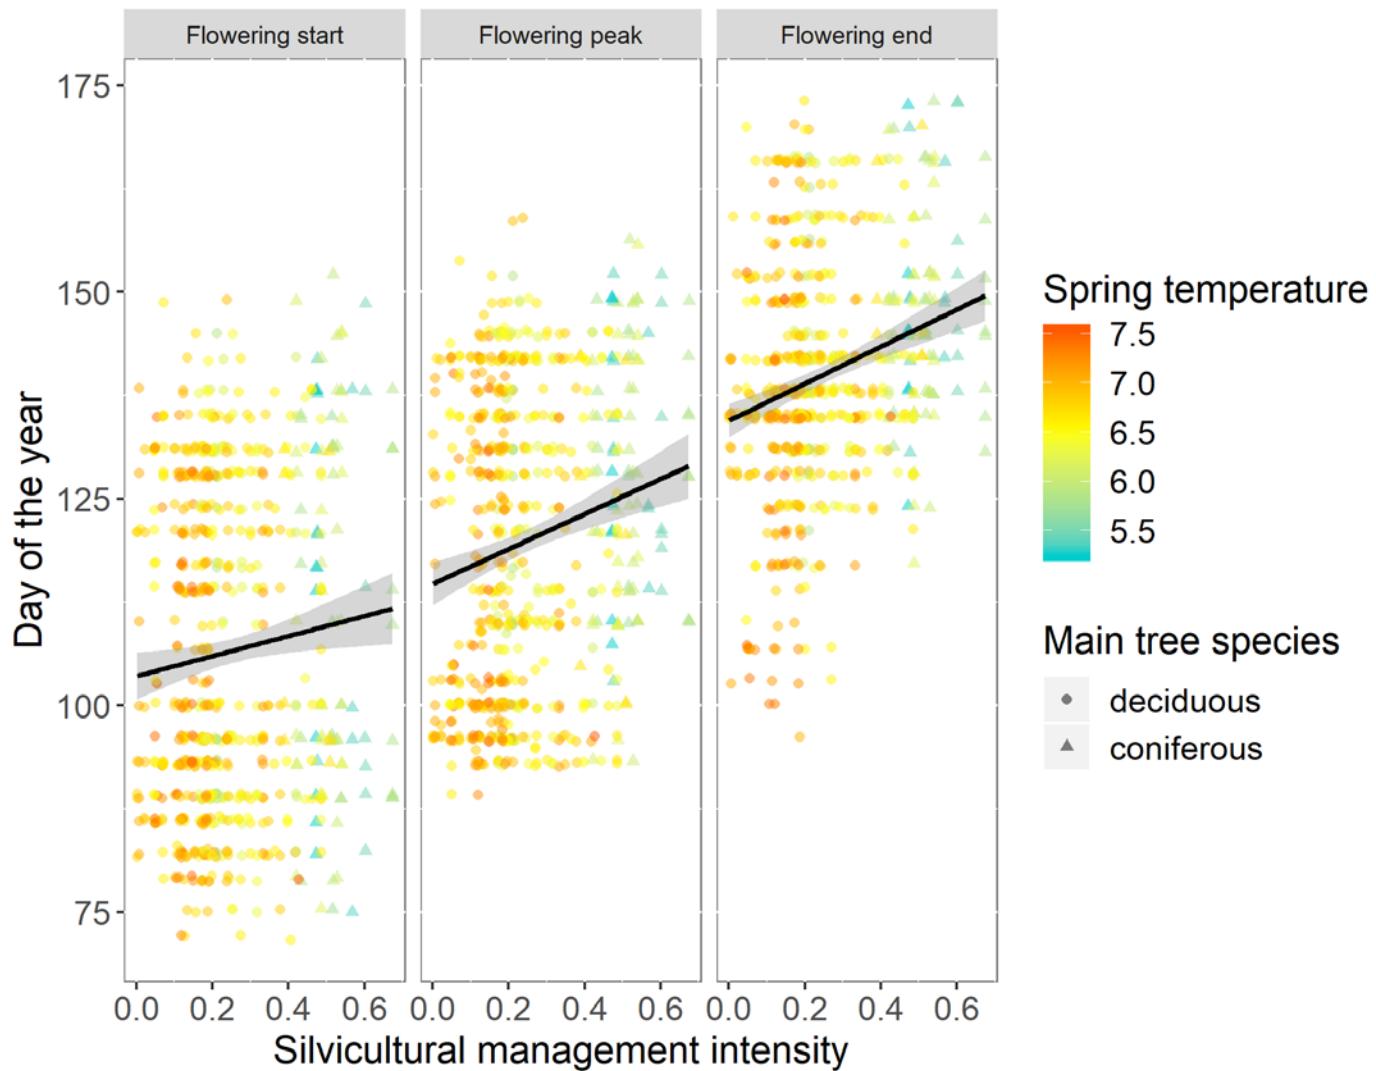

323

324 **Figure 3:** The relationships between silvicultural management intensity and flowering start,  
325 peak and end, respectively, across all studied species. Each point represents a plot by species  
326 combination. Silvicultural management intensity values can range from 0 (lowest  
327 management intensity) to 1 (highest management intensity). The shape and colour of the  
328 symbols code for main tree species and mean spring temperature (see legend). The lines are  
329 linear regressions with 95% confidence intervals.

330

331 Since forest management affects many aspects of forest structure simultaneously (see  
332 Table S7), we used linear regressions to understand which specific forest characteristics were  
333 strongly related to variation in plant phenology. We found the strongest statistical associations



334 with flowering peak for the percentage of the crown projection area and the basal area that is  
335 taken up by coniferous trees (with an average standardized correlation coefficient of 0.41 and  
336 0.40, and mean  $R^2 = 0.20$  and  $0.21$ , maximum  $R^2 = 0.67$ , respectively) (Table 1). The higher  
337 the percentage of coniferous trees was, the later the understory herbs tended to flower (see  
338 also Figure 3). Furthermore, plants flowered later in younger forest stands (average  
339 standardized correlation coefficient  $-0.26$ , with a mean  $R^2 = 0.12$ , maximum  $R^2 = 0.30$ ) and  
340 those with a low structural complexity (average standardized correlation coefficient  $= -0.19$ ,  
341 with a mean  $R^2 = 0.15$  and a maximum  $R^2 = 0.89$ ). Table 1 gives an overview of the  
342 standardized regression coefficients of all forest characteristics, and the corresponding  $R^2$   
343 values and unstandardized regression coefficients are provided in Table S4 and S5.

344 **Table 1:** Relationships between forest characteristics and microclimate (last two columns), and the peak flowering of different plant species. The values are standardized  
 345 regression coefficients derived from linear regressions of flowering peak against the different forest trait and microclimate variables, with significant values in bold (corrected  
 346 using FDR). Blue colours indicate positive relationships, orange colours indicate negative relationships, and colour intensity is proportional to effect size. Age = mean age of  
 347 main tree species, AspSlope = a combination of inclination and exposition, BA = basal area covered by trees, CPA = crown projection area, Con = Coniferous, dbh = diameter  
 348 at breast height, dbh SD = standard deviation of dbh, density = stand density, Div = species richness of trees, Div 2D = inverse Simpson's index for trees, Moristia =  
 349 Morisita's index of dispersion, SCI = Zenner's structural complexity index, SMI = silvicultural management intensity, VMR= Clapham's variance mean ratio. Ta = air  
 350 temperature and rH = relative humidity, with both climate variables measured at 200 cm height during February – May 2017. See Table S8 for a more detailed explanation of  
 351 the different explanatory variables, and Tables S3-S6 for the corresponding  $R^2$  values and unstandardized regression coefficients for all regressions.  
 352

|                                  | Age          | AspSlope     | BA          | Con BA      | Con CPA     | CPA          | Dbh   | Dbh SD       | Density | Div          | Div 2D       | Morisita     | SCI          | SMI         | VMR          | Ta           | rH          |
|----------------------------------|--------------|--------------|-------------|-------------|-------------|--------------|-------|--------------|---------|--------------|--------------|--------------|--------------|-------------|--------------|--------------|-------------|
| <i>Alliaria petiolata</i>        | -0.41        | -0.08        | 0.10        | 0.42        | 0.41        | <b>0.06</b>  | -0.04 | -0.27        | 0.23    | 0.32         | 0.26         | -0.19        | -0.27        | 0.41        | -0.16        | <b>-0.64</b> | 0.26        |
| <i>Allium ursinum</i>            | -0.52        | 0.13         | -0.43       |             |             | <b>-0.39</b> | -0.10 | -0.29        | 0.19    | 0.24         | 0.55         | -0.14        | -0.33        | 0.26        | 0.15         | 0.06         | -0.17       |
| <i>Anemone nemorosa</i>          | <b>-0.37</b> | 0.01         | <b>0.46</b> | <b>0.82</b> | <b>0.82</b> | 0.08         | 0.16  | -0.22        | -0.04   | -0.14        | -0.17        | -0.13        | <b>-0.34</b> | <b>0.54</b> | -0.13        | <b>-0.63</b> | <b>0.37</b> |
| <i>Anemone ranunculooides</i>    | -0.11        | <b>-0.41</b> | 0.00        | 0.32        | 0.34        | <b>0.08</b>  | -0.19 | -0.20        | 0.28    | 0.20         | 0.03         | 0.08         | -0.07        | 0.07        | 0.22         | -0.11        | 0.01        |
| <i>Arum maculatum</i>            | -0.55        | <b>-0.63</b> | -0.10       | 0.19        | 0.18        | <b>0.06</b>  | -0.36 | -0.35        | 0.57    | 0.11         | 0.06         | 0.06         | 0.22         | 0.22        | -0.12        | -0.29        | 0.07        |
| <i>Cardamine bulbifera</i>       | -0.22        | <b>-0.33</b> | <b>0.48</b> | <b>0.58</b> | <b>0.59</b> | 0.11         | 0.31  | -0.01        | -0.22   | -0.31        | <b>-0.35</b> | <b>-0.35</b> | -0.21        | 0.32        | <b>-0.37</b> | <b>-0.65</b> | <b>0.56</b> |
| <i>Ficaria verna</i>             | -0.31        | -0.02        | 0.01        | 0.37        | 0.38        | <b>-0.16</b> | 0.01  | -0.18        | 0.08    | -0.03        | -0.06        | -0.18        | -0.36        | <b>0.45</b> | -0.16        | <b>-0.67</b> | 0.34        |
| <i>Galium odoratum</i>           | <b>-0.39</b> | -0.24        | <b>0.36</b> | <b>0.60</b> | <b>0.61</b> | 0.08         | 0.14  | -0.19        | 0.03    | -0.21        | -0.21        | -0.17        | <b>-0.42</b> | <b>0.49</b> | -0.19        | <b>-0.72</b> | <b>0.36</b> |
| <i>Lathyrus vernus</i>           | -0.14        | <b>-0.28</b> | 0.13        | <b>0.50</b> | <b>0.51</b> | -0.28        | 0.09  | -0.17        | -0.22   | -0.28        | -0.40        | -0.10        | -0.37        | 0.42        | 0.12         | <b>-0.52</b> | <b>0.53</b> |
| <i>Mercurialis perennis</i>      | <b>-0.39</b> | -0.23        | 0.19        | <b>0.53</b> | <b>0.53</b> | -0.08        | 0.07  | -0.27        | 0.02    | -0.06        | -0.08        | -0.22        | -0.32        | <b>0.48</b> | -0.15        | <b>-0.61</b> | <b>0.45</b> |
| <i>Oxalis acetosella</i>         | -0.16        | <b>0.12</b>  | 0.05        | 0.28        | 0.29        | <b>-0.24</b> | 0.02  | -0.08        | 0.03    | -0.21        | -0.13        | -0.13        | -0.18        | 0.30        | -0.11        | <b>-0.49</b> | 0.38        |
| <i>Paris quadrifolia</i>         | -0.14        | 0.49         | 0.19        | 0.45        | 0.43        | -0.14        | 0.24  | -0.06        | -0.12   | 0.24         | 0.04         | 0.02         | -0.40        | 0.41        | 0.02         | -0.12        | -0.07       |
| <i>Polygonatum verticillatum</i> | -0.21        | <b>0.31</b>  | 0.10        | 0.15        | 0.16        | <b>-0.03</b> | -0.07 | <b>-0.40</b> | 0.09    | -0.45        | -0.20        | 0.04         | -0.34        | 0.10        | -0.04        | -0.45        | 0.69        |
| <i>Primula elatior</i>           | -0.26        | -0.09        | 0.46        | <b>0.63</b> | <b>0.63</b> | -0.04        | 0.24  | -0.10        | -0.09   | -0.25        | -0.19        | -0.13        | -0.21        | <b>0.57</b> | -0.11        | <b>-0.52</b> | <b>0.63</b> |
| <i>Pulmonaria obscura</i>        | 0.45         | 0.04         | 0.23        | -0.06       | -0.08       | 0.19         | 0.35  | 0.46         | -0.37   | -0.27        | 0.07         | -0.28        | 0.79         | -0.46       | -0.36        | 0.00         | -0.32       |
| <i>Ranunculus auricomus</i>      | -0.29        | 0.24         | -0.25       | 0.23        | 0.23        | -0.36        | 0.11  | -0.20        | -0.10   | -0.22        | -0.24        | -0.25        | -0.32        | 0.26        | -0.15        | <b>-0.68</b> | 0.06        |
| <i>Stellaria holostea</i>        | -0.38        | -0.42        | 0.07        | 0.32        | 0.35        | <b>0.04</b>  | -0.23 | <b>-0.42</b> | 0.21    | 0.27         | 0.05         | 0.08         | -0.19        | 0.28        | 0.16         | -0.14        | 0.07        |
| <i>Viola reichenbachiana</i>     | -0.24        | -0.28        | <b>0.45</b> | <b>0.51</b> | <b>0.52</b> | 0.08         | 0.31  | 0.01         | -0.24   | <b>-0.36</b> | <b>-0.41</b> | -0.24        | -0.20        | 0.31        | -0.33        | <b>-0.57</b> | <b>0.50</b> |
| Average across all species       | -0.26        | -0.09        | 0.14        | 0.40        | 0.41        | -0.05        | 0.06  | -0.16        | 0.02    | -0.08        | -0.08        | -0.12        | -0.19        | 0.30        | -0.10        | -0.43        | 0.26        |

353

354 *Impact of microclimate on phenology*

355 We found that microclimatic conditions varied substantially between different forest plots,  
356 and that this was partly related to forest management (Figure 3). For instance, on managed  
357 forest plots the mean spring temperatures were substantially lower than on unmanaged forest  
358 plots (5.9 °C on managed coniferous, 6.7 on managed deciduous and 7.0 °C on unmanaged  
359 deciduous plots). The temperature differences were significant ( $P < 0.001$ ) and the pattern is  
360 the same among forest plots within each region (Table S7). Microclimate, in turn, was  
361 significantly correlated with plant phenology. Higher spring and winter temperatures were  
362 generally associated with earlier flowering, whereas higher humidity was correlated with later  
363 flowering (Tables 1 and S2, Figures 4 and S1). Of all microclimatic variables, mean spring  
364 temperature measured at 2 m height explained most of the variability of the peak flowering  
365 across all species (mean  $R^2 = 0.25$ , maximum  $R^2 = 0.52$ , for  $R^2$  values of all linear regression  
366 see: Supplement Table S3). On average, plants flowered 4.5 days earlier per 1 °C temperature  
367 increase, and all plants except *Allium ursinum* L. and *Pulmonaria obscura* Dumont. flowered  
368 earlier on plots with higher mean spring temperatures. However, the magnitudes of the  
369 responses varied substantially among species, ranging from a change of over 12 days per 1 °C  
370 for *Mercurialis perennis* to only minor changes in flowering time of around 1 day per 1 °C for  
371 *Paris quadrifolia* L.

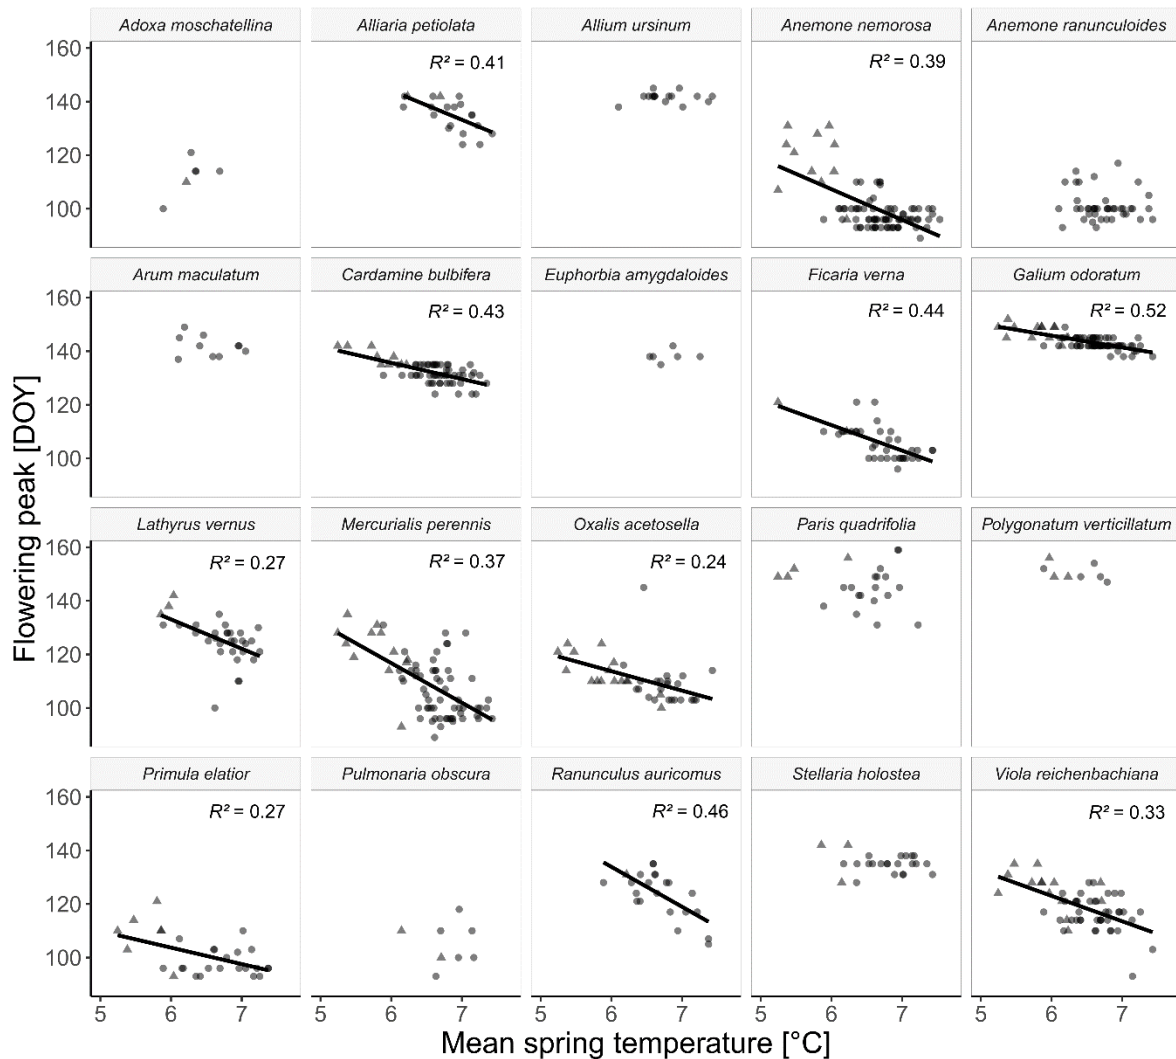

372

373 **Figure 4:** Regression of flowering peak (DOY, day of year) against mean spring temperature.

374 Each point represents a forest plot, and the shape of each point indicates whether the main tree

375 species is deciduous (circle) or coniferous (triangle). For significant regressions, the fitted

376 regression lines are plotted. All regression coefficients are listed in Table S2.

377

378 For a comparison of all standardized and unstandardized regression coefficients of all

379 microclimatic variables see Tables S2 and S4. Of all moisture related variables, relative

380 humidity during spring was the best predictor of peak flowering (mean  $R^2 = 0.15$ , maximum

381  $R^2 = 0.47$ , see Tables S2-S4 and Figure S1) and was therefore included in the SEM. On

382 average, plants flowered 2.7 days later per 10 % increase of relative humidity.

383

384 *Interactions among forest management, microclimate and phenology*

385 The piecewise SEM confirms that, on average, plants flowered earlier on warmer less humid  
386 plots and it is a good fit to the data (Fisher's  $C = 8.364$ ,  $df = 12$ ,  $P = 0.756$ , see Figure 5 and  
387 Table 2). It also shows that most of the forest characteristics – percentage of coniferous trees,  
388 crown projection area, variance mean ratio and structural complexity index – had a significant  
389 influence on the forest microclimate. In particular, spring temperatures were lower on  
390 coniferous forest plots than on deciduous forest plots, and forest plots with a lower crown  
391 projection area (reflecting forest age), variance mean ratio (reflecting horizontal  
392 heterogeneity) and structural complexity were also colder than older and more heterogeneous  
393 and structurally complex forest plots. The relative humidity was higher in forest stands with a  
394 higher percentage of coniferous trees, and it was lower on warmer plots. Plots located in the  
395 Hainich region were generally warmer and more humid and plants tended to flower earlier  
396 there than on the Schwäbische Alb (Figure 5 and Table 2). Furthermore, a high percentage of  
397 coniferous trees had an equally strong direct effect on the timing of flowering peak, with  
398 plants growing on forest stands dominated by Norway spruce flowering later than those in  
399 deciduous forests. All unstandardized and standardized estimates of the path coefficients,  
400 their degrees of freedom, standard errors, critical values and  $P$ -values are listed in Table 2.

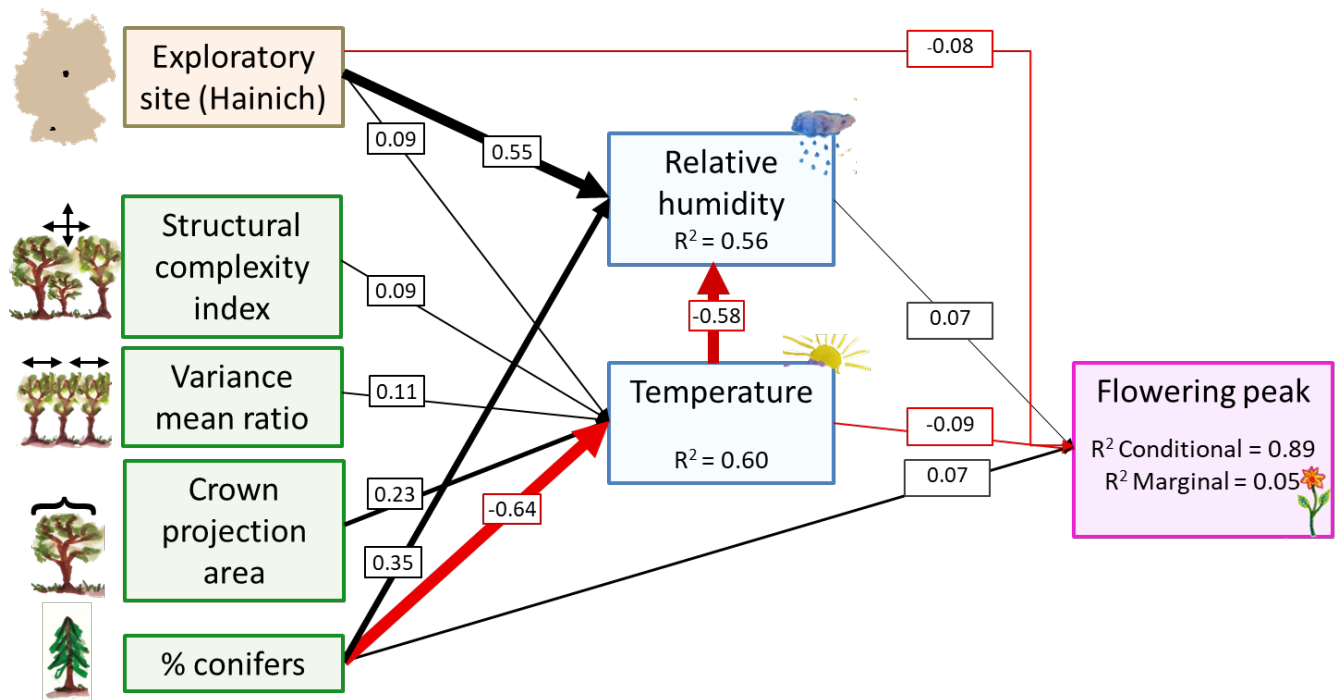

401

402 **Figure 5:** Results of the piecewise structural equation model (SEM) testing for direct and  
403 indirect relationships among forest characteristics, geographic parameters, microclimatic  
404 variables and the timing of peak flowering of forest understory herbs. Arrows represent  
405 unidirectional relationships among variables; only significant paths ( $P < 0.05$ ) are shown.  
406 Black arrows are positive relationships, red arrows negatives ones. The thickness of the  
407 arrows is proportional to the magnitudes of the standardized regression coefficient, which are  
408 also plotted on the arrows. The  $R^2$  values for component models are also given for each  
409 response variable. In the model with flowering peak as a response variable, we included the  
410 species as random factor. The overall model is a good fit to the data: Fisher's  $C = 8.364$ ,  $df =$   
411  $12$ ,  $P$ -value = 0.756.

412 **Table 2:** Unstandardized and standardized estimates of the path coefficients derived from the piecewise SEM, with their respective standard  
 413 errors (SE), degrees of freedom (DF), critical- and *P*-values. Only significant paths are listed. CPA = crown projection area, SCI = Zenner's  
 414 Structural Complexity Index, VMR = Clapham's variance-mean ratio, % conifers = percentage of coniferous trees and Exploratory = region.

| <b>Response</b>   | <b>Predictor</b>      | <b>Estimate</b> | <b>SE</b> | <b>DF</b> | <b>Critical Value</b> | <b><i>P</i>-value</b> | <b>Std. Estimate</b> | <b>Sig.</b> |
|-------------------|-----------------------|-----------------|-----------|-----------|-----------------------|-----------------------|----------------------|-------------|
| Peak flowering    | Temperature           | -3.52           | 0.91      | 571.00    | -3.88                 | 0.000                 | -0.09                | ***         |
| Peak flowering    | Relative humidity     | 0.49            | 0.16      | 571.00    | 3.10                  | 0.002                 | 0.07                 | **          |
| Peak flowering    | % conifers            | 0.0001          | 0.01      | 571.00    | 3.16                  | 0.002                 | 0.07                 | **          |
| Peak flowering    | Exploratory (Hainich) | -3.00           | 0.75      | 571.00    | -3.97                 | 0.000                 | -0.08                | ***         |
| Temperature       | CPA                   | 0.00            | 0.00      | 587.00    | 7.54                  | 0.000                 | 0.23                 | ***         |
| Temperature       | % conifers            | -0.01           | 0.00      | 587.00    | -18.96                | 0.000                 | -0.64                | ***         |
| Temperature       | SCI                   | 0.06            | 0.02      | 587.00    | 2.87                  | 0.004                 | 0.09                 | **          |
| Temperature       | VMR                   | 0.02            | 0.01      | 587.00    | 3.80                  | 0.000                 | 0.11                 | ***         |
| Temperature       | Exploratory (Hainich) | 0.09            | 0.03      | 587.00    | 2.79                  | 0.005                 | 0.09                 | **          |
| Relative humidity | % conifers            | 0.02            | 0.00      | 589.00    | 8.64                  | 0.000                 | 0.35                 | ***         |
| Relative humidity | Temperature           | -2.89           | 0.20      | 589.00    | -14.26                | 0.000                 | -0.58                | ***         |
| Relative humidity | Exploratory (Hainich) | 2.68            | 0.16      | 589.00    | 17.13                 | 0.000                 | 0.55                 | ***         |

415

## 416 Discussion

417 Many organisms respond to anthropogenic environmental change through shifts in their  
418 timing of phenological events, and these changes can have far-reaching consequences for the  
419 ecology and evolution of ecological communities (Rudolf 2019). It is therefore important to  
420 understand the different potential drivers of phenological changes. Here, we disentangled  
421 direct and indirect effects that microclimate and forest management have on the phenology of  
422 understory herbs. We found that plants flowered later in intensely managed forests than in  
423 unmanaged forests. Much of this was because forest management affected microclimate,  
424 which in turn affected phenology, with plants flowering later on colder and moister forest  
425 stands. Our study thus demonstrates that besides climate change other drivers of  
426 environmental change, such as forest management, can influence the phenology of organisms.

427

### 428 *Impact of forest management and forest characteristics on phenology*

429 While climate-related shifts of phenology are widely studied and accepted (e.g Fitter and  
430 Fitter, 2002; Parmesan and Yohe, 2003; Wolkovich et al., 2012; Cook, Wolkovich, and  
431 Parmesan, 2012), the impacts of other global change drivers, such as land use, have received  
432 much less attention. However, land use can also influence life-history traits, such as  
433 phenology, and can even cause genetic differentiation in phenological traits (Völler et al.,  
434 2013; Völler et al., 2017). Our study demonstrated that understory herbs occurring on forest  
435 plots with a high silvicultural management intensity had a significantly delayed start, peak  
436 and end of their flowering periods. On forest stands with the highest forest management  
437 intensity, the plants flowered on average about two weeks later than those growing in  
438 unmanaged forests. Among the different forest characteristics, the percentage of coniferous  
439 trees, the age of the trees and the structural complexity of a forest stand were the strongest



440 drivers of phenological variation. Plants generally flowered later on plots dominated by  
441 coniferous trees that were relatively young and structurally less complex.

442         Within the last years, the evidence that land-use change affects the phenology of plants  
443 and animals has grown. Zhang, Liu and Herebry (2019) showed that land cover and land use  
444 change drive crop phenology, especially in intensively managed agricultural landscapes.  
445 Similarly, Altermatt (2012) showed that temperature-related phenological shifts of butterflies  
446 depend on their habitat. Leong, Ponisio, Kremen, Thorp and Roderick (2016) found that bee  
447 phenology differed between urban and agricultural habitats. For plants it has been suggested  
448 that the combined effects of climate change and land-use change accelerated vegetation  
449 green-up, with human-managed ecosystems greening up faster than their natural counterparts  
450 (Wang et al., 2018).

451         One might argue that the prolongation of the flowering period through diverse forest  
452 management at the landscape scale may improve resource availability and heterogeneity for  
453 consumers (such as bees). However, this probability for this is questionable, since abundance  
454 of many species (and thus their resource availability) was lower on the intensely managed  
455 plots we monitored. Furthermore, within our study regions, planting Norway Spruce is a  
456 forest management action, and there are no unmanaged coniferous forests. To tease apart  
457 management types from tree species identity, it would be scientifically ideal to compare  
458 managed with unmanaged spruce plots, if the latter would exist. Therefore, comparing  
459 plant phenology also between unmanaged and managed coniferous forest (in other regions)  
460 would be a worthwhile focus for future research.

461

#### 462 *Impact of microclimate on phenology*

463 Our studied forest plots not only different in their management, but also in their microclimate.

464 Both simple linear regressions and the SEMs confirmed that the flowering phenology of

465 spring-flowering understory herbs was affected by these microclimatic conditions, with  
466 higher spring (and winter) temperatures resulting in earlier flowering, and higher relative  
467 humidity associated with later flowering. The plants flowered on average 4.5 days earlier per  
468 +1 °C temperature difference. This magnitude of change corresponds very well with the  
469 response of plants to interannual temperature variation observed in previous studies. For  
470 example, Heikinheimo and Lappalainen (1997) suggested that a springtime temperature  
471 increase of 1°C can result in flower buds bursting approximately 4 days earlier, based on  
472 phenological long-term data for eleven plant taxa (trees, shrubs and forest understory herbs)  
473 in Finland. In Britain, the average first flowering of 385 plant species (trees, shrubs and herbs)  
474 was advanced by 4.5 days in the 1990s compared to the previous four decades, and in relation  
475 to climate the effect size was also 4.3 to 6 days per 1°C increase in mean monthly temperature  
476 for spring flowering species (Fitter and Fitter, 2002). Moreover, an analysis of a large  
477 phenological network data set showed that across Europe phenological shifts match the  
478 warming pattern in Europe (Menzel et al., 2006). Our data show that such climatic  
479 differences, and the associated very similar changes in phenology, can also occur on much  
480 smaller scales, and that microclimatic patterns can differ substantially from regional climate  
481 patterns (Hwang et al., 2011; Ward et al., 2018), and we therefore may need to take them into  
482 account when projecting effects of climate change on phenology (De Frenne et al., 2013;  
483 Franklin et al. 2013).

484 We also found that the magnitudes of the temperature-associated phenology changes  
485 varied substantially among species. This is consistent with several previous studies. Fitter and  
486 Fitter (2002), for example, found that annual plants are more likely to flower earlier than  
487 congeneric perennials, and insect-pollinated species more likely than wind-pollinated ones.  
488 Such differences in the phenological response might ultimately alter the structures of plant  
489 communities. Roberts et al. (2015) predicted that interspecific differences would change the

490 order of spring phenology in temperate forests, which in turn would change hierarchies of  
491 light competition and thus potentially the composition of temperate forests. Furthermore, even  
492 if the majority of species flower earlier, some may still show insignificant trends or even  
493 delayed flowering. In a long-term study of 490 species, Cook et al. (2012) demonstrated that  
494 the interaction of fall/winter chilling (i.e. vernalization) and spring warming sensitivities  
495 explains much of the apparently paradoxical behaviour of non-responding species, or of  
496 species that show delayed spring events despite local warming. That, generally, both warmer  
497 spring and winter temperatures are correlated with earlier flowering in our study, indicates  
498 that potential vernalization requirements are probably met for (most of) our plants.

499 High humidity, on average, delayed flowering by around 2.7 days per 10% increase of  
500 relative humidity, and the phenological responses of plants to humidity changes were fairly  
501 consistent. The findings of previous studies were ambiguous. While some suggested that  
502 humidity is crucial for plant phenology (Laube et al., 2014; Matthews and Mazer, 2016),  
503 others found no evidence for a significant role of air humidity for plant phenology (Abu-Asab  
504 et al., 2001; Zipf and Primack, 2017). Thus, phenological responses to humidity generally  
505 seem to be more complex and species-dependent, and they may depend on interactions with  
506 other factors.

507

#### 508 *Interactions among forest management, microclimate and phenology*

509 The SEM confirmed that microclimatic conditions – spring temperature and relative humidity  
510 – are influenced by forest structure which is strongly influenced by forest management. Forest  
511 structure generally seems to have a stronger effect on temperature than on relative humidity.  
512 Our results confirm those of (Augusto, Dupouey, and Ranger 2003; Nihlgard, 1969), showing  
513 that forest dominated by Norway spruce tend to be colder and moister than those dominated  
514 by European beech. A particularly interesting result is that less spatially heterogeneous and

515 structurally complex forest plots with a low crown projection area are colder. This may seem  
516 couterintuitive at first, because during the day plots with a low crown projection area allow  
517 more light to penetrate the canopy and are therefore warmer. However, this trend reverses  
518 during the night where plots with a low crown projection area are colder (see Figure S3),  
519 presumably due to a sheltering effect of large tree crowns, which reduce convection, mixing  
520 of air and infrared reflection (Geiger et al. 2003; von Arx et al., 2013). Since the trend during  
521 the night is stronger than during the day the net effect is a cooling under lower crown  
522 projection areas. The planting of Norway spruce instead of beech is one of the most critical  
523 management decisions. Besides their narrower crown width to diameter ratio to beech, spruce  
524 plantations differ from beech forests in many other characteristics such as stand density, size  
525 distribution, age, horizontal/spatial- and vertical patterns (Schall et al., 2018). A reason why  
526 forest stands dominated by conifers are colder is that particularly in early spring, when  
527 deciduous trees have not completed their leaf-out yet, they allow much less light to reach the  
528 forest floor and thus do not warm up as much during the day.

529 In our study, the dominant tree species affected plant phenology not only indirectly,  
530 through altering microclimate, but also directly. This direct effect is almost as strong as the  
531 effect of temperature, and it must result from other abiotic or biotic factors, besides  
532 temperature and humidity, that the dominating tree species in a forest affects. The two most  
533 likely candidate factors are light and soil conditions. Evergreen, coniferous trees create much  
534 darker conditions on the forest floor during spring, which may be crucial for the development  
535 of the understory vegetation (Tinya et al., 2009). Moreover, coniferous forests are also known  
536 to differ in various biotic and abiotic traits – many soil properties, including soil moisture, pH,  
537 nutrients and mycorrhizae (Augusto, Dupouey, and Ranger, 2003; Messenger, 1980; Ranger  
538 and Claude, 1992) – all of which could affect the phenology of understory plants. Wolf,

539 Zavaleta and Selmants (2017) showed that biotic interactions can affect the timing of  
540 flowering, with plants flowering earlier after (experimentally manipulated) biodiversity loss.

541

542 *Potential consequences of phenological shifts*

543 A phenology that is fine-tuned to environmental conditions is crucial for plants. Plants that  
544 fail to track seasonal temperatures or climatic long-term changes are prone to decline in  
545 abundance (Willis et al., 2008). On the other hand, Scheepens and Stöcklin (2013) showed  
546 that earlier flowering as a response to climatic changes can also be maladaptive and lead to a  
547 fitness decline due to a more rapid development and therefore lower flower numbers.

548 Phenological shifts can alter reproduction and survival, leading to demographic changes

549 (Miller-Rushing et al., 2010), and potentially favouring exotic species (Abu-Asab et al.,

550 2001). Furthermore, a review by Elzinga et al. (2007) argues that that biotic interaction with

551 mutualists and antagonists, e.g. pollinators or pollinator-transmitted fungi, can change plant

552 phenological patterns. It is likely that the biotic and abiotic drivers that determine phenology

553 vary between interacting groups of organisms (or species) such as plants, insects or

554 vertebrates (Parmesan and Yohe, 2003; Voigt et al., 2003). Phenological shifts can alter

555 species interactions and thereby influence the potential for persistence and coexistence of

556 competing species and change biodiversity patterns in natural systems (Rudolf 2019).

557 Asynchronous changes changes could potentially lead to mismatches in phenology (Kharouba

558 et al., 2018; McKinney et al., 2012; Stenseth & Mysterud, 2002; Visser & Both, 2005; Visser,

559 Both, & Lambrechts, 2004), which could exacerbate the effects of climate change on

560 organisms. Several studies found that spring warming can cause plants to flower earlier

561 (Cleland et al., 2007; Parmesan & Yohe, 2003) and create a phenological mismatch between

562 plants and pollinators (Kudo and Ida, 2013; Settele, Bishop, and Potts, 2016), with

563 detrimental effects on plant reproduction (Forrest, 2015) and pollinator fitness (Schenk,

564 Krauss, and Holzschuh, 2018). However, the likeliness of such mismatches is discussed  
565 controversially. Renner and Zohner (2018) argue that mismatches due to climate change are  
566 most likely in antagonistic interactions, whereas there is only limited evidence of  
567 phenological mismatches in mutualistic interactions. A literature review by Kharouba et al.  
568 (2018) suggests that a majority (57%) of interacting species changed their phenologies fairly  
569 synchronously whereas 43% showed a trend toward asynchrony. Besides affecting the  
570 distribution and fitness of interacting species, changes in plant phenology can also affect  
571 ecosystem functions such as productivity and carbon cycling, and they can therefore also  
572 effect yields in agriculture, horticulture, viticulture, and forestry (Cleland et al., 2007; Menzel  
573 et al., 2006).

574

#### 575 *Conclusions*

576 Our study shows that plant phenology is affected by forest management. It thus contributes to  
577 the growing evidence that, besides climate change, other drivers of current environmental  
578 change, such as land use, influence phenology. Forest management interventions – e.g.  
579 planting certain tree species, thinning, selective removal of of target trees or even clearfellings  
580 – change many forest characteristics such as crown projection area, spatial dispersion of trees  
581 and the structural complexity of a forest. Thus, forest management alters forest structure, and  
582 thereby changes the microclimatic conditions of a forest stand, its light conditions as well as  
583 most likely other environmental factors that impact flowering phenology of understory herbs.  
584 These phenology changes in turn can have wide-ranging implications for forest ecosystems  
585 and their long-term composition, stability and evolution.

586

587 **Acknowledgements**

588 We are grateful to the local management teams in the Schwäbische Alb and Hainich for their  
589 assistance in the field. We thank the managers of the three Exploratories, Kirsten Reichel-  
590 Jung, Iris Steitz, Sandra Weithmann, Katrin Lorenzen, Juliane Vogt and Miriam Teuscher and  
591 all former managers for their work in maintaining the plot and project infrastructure,  
592 Christiane Fischer for giving support through the central office, Andreas Ostrowski for  
593 managing the central data base, and Markus Fischer, Eduard Linsenmair, Dominik  
594 Hessenmöller, Daniel Prati, Ingo Schöning, François Buscot, Ernst-Detlef Schulze, Wolfgang  
595 W. Weisser and the late Elisabeth Kalko for their role in setting up the Biodiversity  
596 Exploratories project. The work has been (partly) funded by the DFG Priority Program 1374  
597 "Infrastructure-Biodiversity-Exploratories" (DFG project BO 3241/7-1 to OB). Field work  
598 permits were issued by the responsible state environmental offices of Baden-Württemberg,  
599 Thüringen, and Brandenburg. The authors declare no conflict of interest.

600

601 **Author contributions**

602 OB, JFS and AB designed the study. FMW, SB and MS collected the phenology data, and CA  
603 and PS contributed the forest management data. FMW compiled and analysed all data with  
604 input from OB and JFS. FMW wrote the manuscript with all coauthors contributing to  
605 revisions.

606

607 **References**

608 Abu-Asab, M. S., Peterson, P. M., Shetler, S. G., & Orli, S. S. (2001). Earlier plant  
609 flowering in spring as a response to global warming in the Washington, DC, area.  
610 *Biodiversity & Conservation*, 10(4), 597–612.

- 611 Altermatt, F. (2012). Temperature-related shifts in butterfly phenology depend on the  
612 habitat. *Global Change Biology*, 18(8), 2429–2438.
- 613 Anderson, J. T., Inouye, D. W., McKinney, A. M., Colautti, R. I., & Mitchell-Olds, T.  
614 (2012). Phenotypic plasticity and adaptive evolution contribute to advancing flowering  
615 phenology in response to climate change. *Proceedings of the Royal Society B:  
616 Biological Sciences*, 279(1743), 3843–3852.
- 617 Augusto, L., Dupouey, J.-L., & Ranger, J. (2003). Effects of tree species on understory  
618 vegetation and environmental conditions in temperate forests. *Annals of Forest  
619 Science*, 60(8), 823–831.
- 620 Baker, T. P., Jordan, G. J., Steel, E. A., Fountain-Jones, N. M., Wardlaw, T. J., & Baker, S.  
621 C. (2014). Microclimate through space and time: Microclimatic variation at the edge  
622 of regeneration forests over daily, yearly and decadal time scales. *Forest Ecology and  
623 Management*, 334, 174–184.
- 624 Bellard, C., Bertelsmeier, C., Leadley, P., Thuiller, W., & Courchamp, F. (2012). Impacts  
625 of climate change on the future of biodiversity. *Ecology Letters*, 15(4), 365–377.
- 626 Cerdeira Morellato, L. P., Alberton, B., Alvarado, S. T., Borges, B., Buisson, E., Camargo,  
627 M. G. G., ... Peres, C. A. (2016). Linking plant phenology to conservation biology.  
628 *Biological Conservation*, 195, 60–72.
- 629 Chen, J., Saunders, S. C., Crow, T. R., Naiman, R. J., Brosofske, K. D., Mroz, G. D., ...  
630 Franklin, J. F. (1999). Microclimate in forest ecosystem and landscape ecology:  
631 Variations in local climate can be used to monitor and compare the effects of different  
632 management regimes. *Bioscience*, 49(4), 288–297.
- 633 Chmielewski, F.-M., Müller, A., & Bruns, E. (2004). Climate changes and trends in  
634 phenology of fruit trees and field crops in Germany, 1961–2000. *Agricultural and  
635 Forest Meteorology*, 121(1), 69–78.



- 636 Chuine, I. (2010). Why does phenology drive species distribution? *Philosophical*  
637 *Transactions of the Royal Society of London. Series B, Biological Sciences,*  
638 *365(1555), 3149–3160.*
- 639 Chuine, I., & Regniere, J. (2017). Process-Based Models of Phenology for Plants and  
640 Animals. In D. J. Futuyma (Ed.), *Annual Review of Ecology, Evolution, and*  
641 *Systematics*, 48, 159–182.
- 642 Clark, J. S., Salk, C., Melillo, J., & Mohan, J. (2014). Tree phenology responses to winter  
643 chilling, spring warming, at north and south range limits. *Functional Ecology*, 28(6),  
644 1344–1355.
- 645 Cleland, E. E., Chuine, I., Menzel, A., Mooney, H. A., & Schwartz, M. D. (2007). Shifting  
646 plant phenology in response to global change. *Trends in Ecology & Evolution*, 22(7),  
647 357–365.
- 648 Cook, B. I., Wolkovich, E. M., & Parmesan, C. (2012). Divergent responses to spring and  
649 winter warming drive community level flowering trends. *Proceedings of the National*  
650 *Academy of Sciences of the United States of America*, 109(23), 9000–9005.
- 651 Dahlgren, J. P., Zeipel, H. von, & Ehrlén, J. (2007). Variation in vegetative and flowering  
652 phenology in a forest herb caused by environmental heterogeneity. *American Journal*  
653 *of Botany*, 94(9), 1570–1576.
- 654 De Frenne, P., Rodríguez-Sánchez, F., Coomes, D. A., Baeten, L., Verstraeten, G., Vellend,  
655 M., ... Verheyen, K. (2013). Microclimate moderates plant responses to macroclimate  
656 warming. *Proceedings of the National Academy of Sciences of the United States of*  
657 *America*, 110(46), 18561–18565.
- 658 del Río, M., Pretzsch, H., Alberdi, I., Bielak, K., Bravo, F., Brunner, A., ... Bravo-Oviedo,  
659 A. (2016). Characterization of the structure, dynamics, and productivity of mixed-

- 660 species stands: review and perspectives. *European Journal of Forest Research*,  
661 135(1), 23–49.
- 662 Durant, J. M., Hjermand, D. O., Anker-Nilssen, T., Beaugrand, G., Mysterud, A., Pettorelli,  
663 N., & Stenseth, N. C. (2005). Timing and abundance as key mechanisms affecting  
664 trophic interactions in variable environments. *Ecology Letters*, 8(9), 952–958.
- 665 Elzinga, J. A., Atlan, A., Biere, A., Gigord, L., Weis, A. E., & Bernasconi, G. (2007). Time  
666 after time: flowering phenology and biotic interactions. *Trends in Ecology &  
667 Evolution*, 22(8), 432–439.
- 668 Enquist, C. A. F., Kellermann, J. L., Gerst, K. L., & Miller-Rushing, A. J. (2014).  
669 Phenology research for natural resource management in the United States.  
670 *International Journal of Biometeorology*, 58(4), 579–589.
- 671 Fan, Y., Chen, J., Shirkey, G., John, R., Wu, S. R., Park, H., & Shao, C. (2016).  
672 Applications of structural equation modeling (SEM) in ecological studies: an updated  
673 review. *Ecological Processes*, 5(1), 19.
- 674 Fischer, M., Bossdorf, O., Gockel, S., Hänsel, F., Hemp, A., Hessenmöller, D., ... Weisser,  
675 W. W. (2010). Implementing large-scale and long-term functional biodiversity  
676 research: The Biodiversity Exploratories. *Basic and Applied Ecology*, 11(6), 473–485.
- 677 Fitter, A. H., & Fitter, R. S. R. (2002). Rapid changes in flowering time in British plants.  
678 *Science*, 296(5573), 1689–1691.
- 679 Fletcher, T. D. (2012). *QuantPsyc: Quantitative Psychology Tools. R package version 1.5*.  
680 Retrieved from <https://CRAN.R-project.org/package=QuantPsyc>
- 681 Forrest, J. R. K. (2015). Plant-pollinator interactions and phenological change: what can we  
682 learn about climate impacts from experiments and observations? *Oikos*, 124(1), 4–13.

- 683 Franklin, J., Davis, F. W., Ikegami, M., Syphard, A. D., Flint, L. E., Flint, A. L., & Hannah,  
684 L. (2013). Modeling plant species distributions under future climates: how fine scale  
685 do climate projections need to be? *Global Change Biology*, *19*(2), 473–483.
- 686 Franks, S. J., Sim, S., & Weis, A. E. (2007). Rapid evolution of flowering time by an  
687 annual plant in response to a climate fluctuation. *Proceedings of the National*  
688 *Academy of Sciences of the United States of America*, *104*(4), 1278–1282.
- 689 Geiger, R., Aron, R. H., & Todhunter, P. (2003). *The Climate Near the Ground*. Rowman  
690 & Littlefield.
- 691 Gossner, M. M., Schall, P., Ammer, C., Ammer, U., Engel, K., Schubert, H., ... Weisser,  
692 W. W. (2014). Forest management intensity measures as alternative to stand properties  
693 for quantifying effects on biodiversity. *Ecosphere*, *5*(9), 1–111.
- 694 Heikinheimo, M., & Lappalainen, H. (1997). Dependence of the flower bud burst of some  
695 plant taxa in Finland on effective temperature sum: implications for climate warming.  
696 *Annales Botanici Fennici*, *34*(4), 229–243.
- 697 Høye, T. T., Post, Eric, Schmidt, N. M., Trøjelsgaard, K., & Forchhammer, M. C. (2013).  
698 Shorter flowering seasons and declining abundance of flower visitors in a warmer  
699 Arctic. *Nature Climate Change*, *3*, 759.
- 700 Hwang, T., Song, C., Vose, J. M., & Band, L. E. (2011). Topography-mediated controls on  
701 local vegetation phenology estimated from MODIS vegetation index. *Landscape*  
702 *Ecology*, *26*(4), 541–556.
- 703 IPCC. (2014). *Climate Change 2014: Synthesis Report. Contribution of Working Groups I,*  
704 *II and III to the Fifth Assessment Report of the Intergovernmental Panel on Climate*  
705 *Change [Core Writing Team, R.K. Pachauri and L.A. Meyer (eds.)]. IPCC, Geneva,*  
706 *Switzerland, (p. 151 pp.). p. 151 pp.*

- 707 Kharouba, H. M., Ehrlén, J., Gelman, A., Bolmgren, K., Allen, J. M., Travers, S. E., &  
708 Wolkovich, E. M. (2018). Global shifts in the phenological synchrony of species  
709 interactions over recent decades. *Proceedings of the National Academy of Sciences of*  
710 *the United States of America*, 115(20), 5211–5216.
- 711 Kline, R. B. (2015). *Principles and Practice of Structural Equation Modeling, Fourth*  
712 *Edition*. Guilford Publications.
- 713 Kudo, G., & Ida, T. Y. (2013). Early onset of spring increases the phenological mismatch  
714 between plants and pollinators. *Ecology*, 94(10), 2311–2320.
- 715 Lapointe, L. (2001). How phenology influences physiology in deciduous forest spring  
716 ephemerals. *Physiologia Plantarum*, 113(2), 151–157.
- 717 Laube, J., Sparks, T. H., Estrella, N., & Menzel, A. (2014). Does humidity trigger tree  
718 phenology? Proposal for an air humidity based framework for bud development in  
719 spring. *The New Phytologist*, 202(2), 350–355.
- 720 Lefcheck, J. S. (2016). PiecewiseSEM : Piecewise structural equation modelling in R for  
721 ecology, evolution, and systematics. *Methods in Ecology and Evolution / British*  
722 *Ecological Society*, 7(5), 573–579.
- 723 Leong, M., Ponisio, L. C., Kremen, C., Thorp, R. W., & Roderick, G. K. (2016). Temporal  
724 dynamics influenced by global change: bee community phenology in urban,  
725 agricultural, and natural landscapes. *Global Change Biology*, 22(3), 1046–1053.
- 726 Lieth, H. (1974). *Phenology and seasonality modeling*. Presented at the New York.  
727 Retrieved from [http://www.worldcat.org/title/phenology-and-seasonality-](http://www.worldcat.org/title/phenology-and-seasonality-modeling/oclc/799774)  
728 [modeling/oclc/799774](http://www.worldcat.org/title/phenology-and-seasonality-modeling/oclc/799774)
- 729 Matthews, E. R., & Mazer, S. J. (2016). Historical changes in flowering phenology are  
730 governed by temperature x precipitation interactions in a widespread perennial herb in  
731 western North America. *The New Phytologist*, 210(1), 157–167.

- 732 McKinney, A. M., CaraDonna, P. J., Inouye, D. W., Barr, B., Bertelsen, C. D., & Waser, N.  
733 M. (2012). Asynchronous changes in phenology of migrating Broad-tailed  
734 Hummingbirds and their early-season nectar resources. *Ecology*, *93*(9), 1987–1993.
- 735 Memmott, J., Craze, P. G., Waser, N. M., & Price, M. V. (2007). Global warming and the  
736 disruption of plant-pollinator interactions. *Ecology Letters*, *10*(8), 710–717.
- 737 Menzel, A., Sparks, T., Estrella, N., Koch, E., & Züst, A. (2006). European phenological  
738 response to climate change matches the warming pattern. *Global Change Biology*,  
739 *12*(10), 1969.
- 740 Messenger, A. S. (1980). Spruce plantation effects on soil moisture and chemical element  
741 distribution. *Forest Ecology and Management*, *3*, 113–125.
- 742 Miller-Rushing, A. J., Høye, T. T., Inouye, D. W., & Post, E. (2010). The effects of  
743 phenological mismatches on demography. *Philosophical Transactions of the Royal  
744 Society of London. Series B, Biological Sciences*, *365*(1555), 3177–3186.
- 745 Nihlgård, B. (1969). The Microclimate in a beech and a spruce forest - a comparative study  
746 from Kongalund, Scania, Sweden,. *Bot. Notiser*, *5*(122 ), 333–352.
- 747 Pacifici, M., Foden, W. B., Visconti, P., Watson, J. E. M., Butchart, S. H. M., Kovacs, K.  
748 M., ... Rondinini, C. (2015). Assessing species vulnerability to climate change.  
749 *Nature Climate Change*, *5*, 215.
- 750 Parmesan, C., & Yohe, G. (2003). A globally coherent fingerprint of climate change  
751 impacts across natural systems. *Nature*, *421*(6918), 37–42.
- 752 Pau, S., Wolkovich, E. M., Cook, B. I., Davies, T. J., Kraft, N. J. B., Bolmgren, K., ...  
753 Cleland, E. E. (2011). Predicting phenology by integrating ecology, evolution and  
754 climate science. *Global Change Biology*, *17*(12), 3633–3643.
- 755 Penttinen, A., Stoyan, D., & Henttonen, H. M. (1992). Marked Point Processes in Forest  
756 Statistics. *Forest Science*, *38*(4), 806–824.

- 757 Ranger, J., & Claude, N. Y. S. (1992). Effects of Spruce Plantation (*Picea Abies* Karst.) On  
758 the Soil Function of a Previous Broadleaved Ecosystem: Analytical and Experimental  
759 Investigations. In A. Teller, P. Mathy, & J. N. R. Jeffers (Eds.), *Responses of Forest*  
760 *Ecosystems to Environmental Changes* (pp. 784–785). Dordrecht: Springer  
761 Netherlands.
- 762 R Core Team. (2018). R: A language and environment for statistical computing. Vienna: R  
763 Foundation for Statistical Computing (Version R version 3.5.0 (2018-04-23)).  
764 Retrieved from <https://www.R-project.org>
- 765 Reilly, J., Baethgen, W., Chege, F. E., van de Geijn, S. C., Erda, L., Iglesias, A., ...  
766 Howden, M. (1996). Agriculture in a changing climate: impacts and adaptation. In  
767 *Climate change 1995; impacts, adaptations and mitigation of climate change:*  
768 *scientific-technical analyses* (pp. 427–467). Cambridge, UK: Cambridge University  
769 Press.
- 770 Renner, S. S., & Zohner, C. M. (2018). Climate Change and phenological mismatch in  
771 trophic interactions among plants, insects, and vertebrates. *Annual Review of Ecology,*  
772 *Evolution, and Systematics*, 49(1), 165–182.
- 773 Richardson, A. D., Anderson, R. S., Arain, M. A., Barr, A. G., Bohrer, G., Chen, G., ...  
774 Xue, Y. (2012). Terrestrial biosphere models need better representation of vegetation  
775 phenology: results from the North American Carbon Program Site Synthesis. *Global*  
776 *Change Biology*, 18(2), 566–584.
- 777 Richardson, A. D., Black, T. A., Ciais, P., Delbart, N., Friedl, M. A., Gobron, N., ...  
778 Varlagin, A. (2010). Influence of spring and autumn phenological transitions on forest  
779 ecosystem productivity. *Philosophical Transactions of the Royal Society of London.*  
780 *Series B, Biological Sciences*, 365(1555), 3227–3246.

- 781 Richardson, A. D., Keenan, T. F., Migliavacca, M., Ryu, Y., Sonnentag, O., & Toomey, M.  
782 (2013). Climate change, phenology, and phenological control of vegetation feedbacks  
783 to the climate system. *Agricultural and Forest Meteorology*, *169*, 156–173.
- 784 Roberts, A. M. I., Tansey, C., Smithers, R. J., & Phillimore, A. B. (2015). Predicting a  
785 change in the order of spring phenology in temperate forests. *Global Change Biology*,  
786 *21*(7), 2603–2611.
- 787 Rudolf, V. H. W. (2019). The role of seasonal timing and phenological shifts for species  
788 coexistence. *Ecology Letters*, *22*(8), 1324–1338.
- 789 Ryu, E. (2011). Effects of skewness and kurtosis on normal-theory based maximum  
790 likelihood test statistic in multilevel structural equation modeling. *Behavior Research*  
791 *Methods*, *43*(4), 1066–1074.
- 792 Schall, P., & Ammer, C. (2013). How to quantify forest management intensity in Central  
793 European forests. *European Journal of Forest Research*, *132*(2), 379–396.
- 794 Schall, P., Schulze, E.-D., Fischer, M., Ayasse, M., & Ammer, C. (2018). Relations  
795 between forest management, stand structure and productivity across different types of  
796 Central European forests. *Basic and Applied Ecology*.
- 797 Scheepens, J. F., & Stöcklin, J. (2013). Flowering phenology and reproductive fitness along  
798 a mountain slope: maladaptive responses to transplantation to a warmer climate in  
799 *Campanula thyrsoidea*. *Oecologia*, *171*(3), 679–691.
- 800 Schenk, M., Krauss, J., & Holzschuh, A. (2018). Desynchronizations in bee-plant  
801 interactions cause severe fitness losses in solitary bees. *The Journal of Animal*  
802 *Ecology*, *87*(1), 139–149.
- 803 Schleip, C., Rais, A., & Menzel, A. (2009). Bayesian analysis of temperature sensitivity of  
804 plant phenology in Germany. *Agricultural and Forest Meteorology*, *149*(10), 1699–  
805 1708.

- 806 Schulze, E. D., Aas, G., Grimm, G. W., Gossner, M. M., Walentowski, H., Ammer, C., ...  
807 von Gadow, K. (2016). A review on plant diversity and forest management of  
808 European beech forests. *European Journal of Forest Research*, 135(1), 51–67.
- 809 Schwartz, M. D., Ahas, R., & Aasa, A. (2006). Onset of spring starting earlier across the  
810 Northern Hemisphere. *Global Change Biology*, 12(2), 343–351.
- 811 Schweiger, O., Heikkinen, R. K., Harpke, A., Hickler, T., Klotz, S., Kudrna, O., ... Settele,  
812 J. (2012). Increasing range mismatching of interacting species under global change is  
813 related to their ecological characteristics. *Global Ecology and Biogeography: A*  
814 *Journal of Macroecology*, 21(1), 88–99.
- 815 Schweiger, O., Settele, J., Kudrna, O., Klotz, S., & Kühn, I. (2008). Climate change can  
816 cause spatial mismatch of trophically interacting species. *Ecology*, 89(12), 3472–3479.
- 817 Settele, J., Bishop, J., & Potts, S. G. (2016). Climate change impacts on pollination. *Nature*  
818 *Plants*, 2(7), 16092.
- 819 Shipley, B. (2009). Confirmatory path analysis in a generalized multilevel context.  
820 *Ecology*, 90(2), 363–368.
- 821 Spiecker, H. (2003). Silvicultural management in maintaining biodiversity and resistance of  
822 forests in Europe—temperate zone. *Journal of Environmental Management*, 67(1),  
823 55–65.
- 824 Stenseth, N. C., & Mysterud, A. (2002). Climate, changing phenology, and other life  
825 history traits: nonlinearity and match-mismatch to the environment. *Proceedings of*  
826 *the National Academy of Sciences of the United States of America*, 99(21), 13379–  
827 13381.
- 828 Tang, J., Körner, C., Muraoka, H., Piao, S., Shen, M., Thackeray, S. J., & Yang, X. (2016).  
829 Emerging opportunities and challenges in phenology: a review. *Ecosphere*, 7(8).  
830 <https://doi.org/10.1002/ecs2.1436>



- 831 Tinya, F., Márialigeti, S., Király, I., Németh, B., & Ódor, P. (2009). The effect of light  
832 conditions on herbs, bryophytes and seedlings of temperate mixed forests in Órség,  
833 Western Hungary. *Plant Ecology*, 204(1), 69.
- 834 Visser, M. E., & Both, C. (2005). Shifts in phenology due to global climate change: the  
835 need for a yardstick. *Proceedings of the Royal Society B: Biological Sciences*  
836 272(1581), 2561–2569.
- 837 Visser, M. E., Both, C., & Lambrechts, M. M. (2004). Global climate change leads to  
838 mistimed avian reproduction. In *Advances in Ecological Research* (Vol. 35, pp. 89–  
839 110). Academic Press.
- 840 Voigt, W., Perner, J., Davis, A. J., Eggers, T., Schumacher, J., Bährmann, R., ... Sander, F.  
841 W. (2003). Trophic levels are differentially sensitive to climate. *Ecology*, 84(9), 2444–  
842 2453.
- 843 Völler, E., Auge, H., Bossdorf, O., & Prati, D. (2013). Land use causes genetic  
844 differentiation of life-history traits in *Bromus hordeaceus*. *Global Change Biology*,  
845 19(3), 892–899.
- 846 Völler, E., Bossdorf, O., Prati, D., & Auge, H. (2017). Evolutionary responses to land use  
847 in eight common grassland plants. *The Journal of Ecology*, 105(5), 1290–1297.
- 848 von Arx, G., Graf Pannatier, E., Thimonier, A., & Rebetez, M. (2013). Microclimate in  
849 forests with varying leaf area index and soil moisture: potential implications for  
850 seedling establishment in a changing climate. *The Journal of Ecology*, 101(5), 1201–  
851 1213.
- 852 Walther, G.-R. (2010). Community and ecosystem responses to recent climate change.  
853 *Philosophical Transactions of the Royal Society of London. Series B, Biological*  
854 *Sciences*, 365(1549), 2019–2024.

- 855 Walther, G.-R., Post, E., Convey, P., Menzel, A., Parmesan, C., Beebee, T. J. C., ...  
856 Bairlein, F. (2002). Ecological responses to recent climate change. *Nature*, *416*(6879),  
857 389–395.
- 858 Wang, L., Tian, F., Wang, Y., Wu, Z., Schurgers, G., & Fensholt, R. (2018). Acceleration  
859 of global vegetation greenup from combined effects of climate change and human land  
860 management. *Global Change Biology*, *24*(11), 5484–5499.
- 861 Ward, S. E., Schulze, M., & Roy, B. (2018). A long-term perspective on microclimate and  
862 spring plant phenology in the Western Cascades. *Ecosphere*, *9*(10), e02451.
- 863 Willis, C. G., Ruhfel, B., Primack, R. B., Miller-Rushing, A. J., & Davis, C. C. (2008).  
864 Phylogenetic patterns of species loss in Thoreau’s woods are driven by climate  
865 change. *Proceedings of the National Academy of Sciences of the United States of*  
866 *America*, *105*(44), 17029–17033.
- 867 Wolf, A. A., Zavaleta, E. S., & Selmants, P. C. (2017). Flowering phenology shifts in  
868 response to biodiversity loss. *Proceedings of the National Academy of Sciences of the*  
869 *United States of America*, *114*(13), 3463–3468.
- 870 Wolkovich, E. M., Cook, B. I., Allen, J. M., Crimmins, T. M., Betancourt, J. L., Travers, S.  
871 E., ... Cleland, E. E. (2012). Warming experiments underpredict plant phenological  
872 responses to climate change. *Nature*, *485*(7399), 494–497.
- 873 Zenner, E. K. (1998). *A new index for describing the structural complexity of forests*  
874 (Doctoral, Oregon State University). Retrieved from  
875 <http://ir.library.oregonstate.edu/downloads/bc386n18x>
- 876 Zenner, E. K., & Hibbs, D. E. (2000). A new method for modeling the heterogeneity of  
877 forest structure. *Forest Ecology and Management*, *129*(1), 75–87.

- 878 Zhang, X., Liu, L., & Henebry, G. M. (2019). Impacts of land cover and land use change  
879 on long-term trend of land surface phenology: a case study in agricultural ecosystems.  
880 *Environmental Research Letters*, 14(4).
- 881 Zipf, L., & Primack, R. B. (2017). Humidity does not appear to trigger leaf out in woody  
882 plants. *International Journal of Biometeorology*, 61(12), 2213–2216.

883  
884 **SUPPORTING INFORMATION**

- 885  
886 **Table S1:** Studied species and their mean flowering start, peak and end as well as the  
887 numbers of plots they were flowering on ( $N$ ).
- 888 **Table S2:** Relationships between microclimate and the peak flowering of different plant  
889 species, listing standardized regression coefficients derived from linear regressions of  
890 flowering peak against the different microclimate variables.
- 891 **Figure S1:** Regression of flowering peak against mean spring relative humidity.
- 892 **Figure S2:** Pearson's correlations among all forest variables, spring temperature ( $T_a$ ) and  
893 relative humidity (rH) and the respective scatterplots and histograms.
- 894 **Table S3:** Relationships between microclimate and the peak flowering of different plant  
895 species, listing  $R^2$ -values derived from linear regressions of flowering peak against the  
896 different microclimatic variables.
- 897 **Table S4:** Relationships between microclimate and the peak flowering of different plant  
898 species, listing regression coefficients derived from linear regressions of flowering peak  
899 against the different microclimatic variables.
- 900 **Table S5:** Relationships between forest characteristics and the peak flowering of different  
901 plant species, listing  $R^2$ -values derived from linear regressions of flowering peak against the  
902 different forest trait variables.
- 903 **Table S6:** Relationships between forest characteristics and the peak flowering of different  
904 plant species. The values are regression coefficients derived from linear regressions of  
905 flowering peak against the different microclimate variables, with significant values in bold.
- 906 **Table S7:** Mean values of estimated management intensity, structural characteristics and  
907 microclimatic conditions for the different forest management types.
- 908 **Figure S3:** Relationship between crown projection area and spring temperature over 24 hours,  
909 during the day and during the night.

910 **Table S8:** Overview of all explanatory variables that were used within linear regressions and  
911 the structural equation model (SEM).  
912
